# Supplementary material for: Diagnostic Workup and Outcome in Patients with Profound Hyponatremia
Source: MDPI journal article supplement (doi:10.3390/jcm12103567), 2023-05-19
Supplement: s1 [file s1]

**Table S1.** Diagnoses among patients with multiple aetiologies for hyponatremia (n = 42).

| <b>Aetiology</b>             | <b>Number of Patients</b> |
|------------------------------|---------------------------|
| Drug-induced                 | 26                        |
| SIAD                         | 35                        |
| Heart, kidney, liver failure | 7                         |
| High water, low sodium       | 11                        |
| Translocational              | 1                         |
| Post-surgical                | 0                         |
| Other <sup>1</sup>           | 16                        |

<sup>1</sup> pseudohyponatremia, gastrointestinal sodium loss, hypovolemia not otherwise specified, central and primary adrenal insufficiency, cerebral salt wasting, hypothyroidism.
